# Supplementary material for: The Modifying Effect of Obesity on the Association of Matrix Metalloproteinase Gene Polymorphisms with Breast Cancer Risk
Source: MDPI journal article supplement (doi:10.3390/biomedicines10102617), 2022-10-18
Supplement: s1 [file s1]

### Supplementary Table S3

The allele and genotype frequencies of the studied SNPs in the breast cancer and control groups with BMI<30.

| Chr                            | SNP       | Gene         | Minor allele | Major allele | Minor allele frequency | Number of the studied chromosomes | Genotype distribution * | H <sub>o</sub> | H <sub>e</sub> | P <sub>HWE</sub> |
|--------------------------------|-----------|--------------|--------------|--------------|------------------------|-----------------------------------|-------------------------|----------------|----------------|------------------|
| Breast cancer patients (n=239) |           |              |              |              |                        |                                   |                         |                |                |                  |
| 11                             | rs1940475 | <i>MMP-8</i> | T            | C            | 0.479                  | 474                               | 46/135/56               | 0.57           | 0.50           | 0.037            |
| 11                             | rs1799750 | <i>MMP-1</i> | 2G           | 1G           | 0.460                  | 474                               | 48/122/67               | 0.51           | 0.50           | 0.604            |
| 11                             | rs679620  | <i>MMP-3</i> | T            | C            | 0.460                  | 476                               | 48/123/67               | 0.52           | 0.50           | 0.602            |
| 16                             | rs243865  | <i>MMP-2</i> | T            | C            | 0.247                  | 466                               | 12/91/130               | 0.39           | 0.37           | 0.596            |
| 20                             | rs3918242 | <i>MMP-9</i> | T            | C            | 0.150                  | 474                               | 9/53/175                | 0.22           | 0.25           | 0.071            |
| 20                             | rs3918249 | <i>MMP-9</i> | C            | T            | 0.358                  | 466                               | 34/99/100               | 0.42           | 0.46           | 0.255            |
| 20                             | rs17576   | <i>MMP-9</i> | G            | A            | 0.351                  | 470                               | 33/99/103               | 0.42           | 0.46           | 0.253            |
| 20                             | rs3787268 | <i>MMP-9</i> | A            | G            | 0.257                  | 464                               | 19/81/132               | 0.35           | 0.38           | 0.227            |
| 20                             | rs2250889 | <i>MMP-9</i> | G            | C            | 0.087                  | 472                               | 3/35/198                | 0.15           | 0.16           | 0.395            |
| 20                             | rs17577   | <i>MMP-9</i> | A            | G            | 0.156                  | 474                               | 9/56/172                | 0.24           | 0.26           | 0.134            |
| Control group (n=556)          |           |              |              |              |                        |                                   |                         |                |                |                  |
| 11                             | rs1940475 | <i>MMP-8</i> | T            | C            | 0.496                  | 1104                              | 149/249/154             | 0.45           | 0.50           | 0.022            |
| 11                             | rs1799750 | <i>MMP-1</i> | 2G           | 1G           | 0.460                  | 1074                              | 119/256/162             | 0.48           | 0.50           | 0.341            |
| 11                             | rs679620  | <i>MMP-3</i> | T            | C            | 0.498                  | 1102                              | 141/267/143             | 0.48           | 0.50           | 0.495            |
| 16                             | rs243865  | <i>MMP-2</i> | T            | C            | 0.257                  | 1090                              | 40/200/305              | 0.37           | 0.38           | 0.370            |
| 20                             | rs3918242 | <i>MMP-9</i> | T            | C            | 0.157                  | 1098                              | 12/148/389              | 0.27           | 0.26           | 0.747            |
| 20                             | rs3918249 | <i>MMP-9</i> | C            | T            | 0.383                  | 1098                              | 80/261/208              | 0.48           | 0.47           | 0.928            |
| 20                             | rs17576   | <i>MMP-9</i> | G            | A            | 0.384                  | 1108                              | 84/257/213              | 0.46           | 0.47           | 0.654            |
| 20                             | rs3787268 | <i>MMP-9</i> | A            | G            | 0.217                  | 1098                              | 25/188/336              | 0.34           | 0.34           | 0.901            |
| 20                             | rs2250889 | <i>MMP-9</i> | G            | C            | 0.108                  | 1094                              | 10/98/439               | 0.18           | 0.19           | 0.117            |
| 20                             | rs17577   | <i>MMP-9</i> | A            | G            | 0.158                  | 1080                              | 11/149/380              | 0.28           | 0.27           | 0.518            |

Note: \* minor allele homozygotes / heterozygotes / major allele homozygotes.
