# Supplementary material for: The Modifying Effect of Obesity on the Association of Matrix Metalloproteinase Gene Polymorphisms with Breast Cancer Risk
Source: MDPI journal article supplement (doi:10.3390/biomedicines10102617), 2022-10-18
Supplement: s1 [file s1]

# Supplementary Table S1

The literature data about associations of the studied polymorphisms of the *MMP* genes with breast cancer.

| Chr | SNP       | Gene  | Number of publications in PubMed/PubMed Central | Phenotype                         | Association, significance (associated allele/genotype/haplotype)                       | Reference                 |
|-----|-----------|-------|-------------------------------------------------|-----------------------------------|----------------------------------------------------------------------------------------|---------------------------|
| 11  | rs1940475 | MMP-8 | 9/25                                            | breast cancer                     | p>0.05                                                                                 | Pharoah et al., 2007      |
|     |           |       |                                                 | breast cancer metastasis          | OR=0.60, p=0.03 (T)                                                                    | Decock et al., 2007       |
|     |           |       |                                                 | breast cancer                     | p>0.05                                                                                 | Mavaddat et al., 2009     |
|     |           |       |                                                 | breast cancer                     | p>0.05                                                                                 | Wang et al., 2018         |
|     |           |       |                                                 | breast cancer                     | OR=1.23, p=0.048 (haplotype AGTCA rs3740938-rs2012390-rs1940475-rs11225394-rs11225395) | Wang et al., 2018         |
| 11  | rs1799750 | MMP-1 | 92/156                                          | breast cancer                     | p>0.05                                                                                 | Biondi et al., 2000       |
|     |           |       |                                                 | breast cancer metastasis          | p>0.05                                                                                 | Ghilardi et al., 2002     |
|     |           |       |                                                 | breast cancer metastasis          | OR>1, p<0.001 (2G)                                                                     | Przybylowska et al., 2004 |
|     |           |       |                                                 | breast cancer metastasis          | OR=2.14, p<0.05 (2G/2G)<br>OR=1.68, p<0.05 (2G)                                        | Przybylowska et al., 2006 |
|     |           |       |                                                 | breast cancer malignance          | OR=2.58, p<0.05 (2G)                                                                   | Przybylowska et al., 2006 |
|     |           |       |                                                 | lymph node-positive breast cancer | OR=3.9, p<0.05 (2G/2G) (mixed ethnicities)<br>OR=2.6, p<0.05 (2G/2G) (caucasian)       | Hughes et al., 2007       |

|    |          |       |        |                                                                |                                                            |                              |
|----|----------|-------|--------|----------------------------------------------------------------|------------------------------------------------------------|------------------------------|
|    |          |       |        | reduced survival among breast cancer women                     | HR=3.1, p<0.05 (2G/2G)                                     | Hughes et al., 2007          |
|    |          |       |        | breast cancer                                                  | p>0.05                                                     | Beeghly-Fadiel et al., 2009a |
|    |          |       |        | breast cancer                                                  | p>0.05                                                     | McColgan et al., 2009        |
|    |          |       |        | breast cancer                                                  | p>0.05                                                     | Zhou et al., 2011            |
|    |          |       |        | breast cancer metastasis                                       | OR=2.18, p<0.05 (2G/2G)<br>OR=1.59, p<0.05 (2G/2G + 1G/2G) | Liu et al., 2012             |
|    |          |       |        | breast cancer                                                  | p>0.05                                                     | Su et al., 2016              |
|    |          |       |        | breast cancer                                                  | p>0.05                                                     | Zhou et al., 2018            |
|    |          |       |        | breast cancer                                                  | OR>1, p<0.05 (2G)                                          | Padala et al., 2017          |
|    |          |       |        | breast cancer                                                  | p>0.05                                                     | Hsiao et al., 2018           |
|    |          |       |        | breast cancer                                                  | p>0.05                                                     | Białkowska et al., 2020      |
|    |          |       |        | breast cancer                                                  | OR = 4.86, p = 0.0001 (2G2G vs. 1G1G)                      | Balkhi et al., 2020          |
|    |          |       |        | breast cancer                                                  | OR<1, p<0.05 (1G/2G)                                       | Sui et al., 2021             |
| 11 | rs679620 | MMP-3 | 41/100 | breast cancer                                                  | p>0.05                                                     | Beeghly-Fadiel et al., 2009a |
|    |          |       |        | breast cancer (lymph node or distant metastasis)               | OR<1, p=0.049 (AG)                                         | Chan, 2013                   |
| 16 | rs243865 | MMP-2 | 92/109 | breast cancer                                                  | OR=0.46, p<0.05 (CT+ TT vs. CC)                            | Zhou et al., 2004            |
|    |          |       |        | poor survival among patients with ER negative of breast cancer | p < 0.001 (TT vs. CC +CT)                                  | Grieu et al., 2004           |
|    |          |       |        | breast cancer                                                  | p>0.05                                                     | Lei et al., 2007             |

|  |  |  |                                                              |                                                                  |                              |
|--|--|--|--------------------------------------------------------------|------------------------------------------------------------------|------------------------------|
|  |  |  | breast cancer<br>progesterone receptor<br>status             | OR 2.34, p<0.05 (combination<br>TT rs243865 and CC<br>rs3918242) | Lei et al., 2007             |
|  |  |  | breast cancer                                                | p>0.05                                                           | Roehe et al., 2007           |
|  |  |  | breast cancer                                                | OR=2.15, p=0.01 (CC)                                             | Delgado-Enciso et al., 2008  |
|  |  |  | breast cancer among<br>women younger than<br>50 years of age | OR=2.66, p<0.05 (CC)                                             | Delgado-Enciso et al., 2008  |
|  |  |  | breast cancer                                                | p>0.05                                                           | Beeghly-Fadiel et al., 2009b |
|  |  |  | breast cancer                                                | p>0.05                                                           | McColgan et al., 2009        |
|  |  |  | breast cancer                                                | OR = 1.27, p = 0.001 (CC)                                        | Zhou et al., 2011            |
|  |  |  | breast cancer<br>metastasis                                  | p>0.05                                                           | Liu et al., 2012             |
|  |  |  | breast cancer                                                | OR=2.02, p=0.02 (CC)                                             | Saeed et al., 2013           |
|  |  |  | breast cancer                                                | p>0.05                                                           | Zagouri et al., 2013         |
|  |  |  | breast cancer                                                | p>0.05                                                           | Slattery et al., 2013        |
|  |  |  | breast cancer                                                | p>0.05                                                           | Ledwoń et al., 2013          |
|  |  |  | breast cancer                                                | p>0.05                                                           | Shevchenko et al., 2014      |
|  |  |  | breast cancer<br>(summary, European<br>and Asian)            | p>0.05                                                           | Yang et al., 2014            |
|  |  |  | breast cancer<br>(Latin-Americans)                           | OR=0.61, p=0.02 (TT+TC vs<br>CC)                                 | Yang et al., 2014            |
|  |  |  | breast cancer                                                | OR=0.49, p<0.05 (TT+TC vs<br>CC)                                 | Néjima et al., 2015          |
|  |  |  | breast cancer                                                | p>0.05                                                           | Manshadi et al., 2018        |
|  |  |  | breast cancer                                                | OR=0.001, p<0.05                                                 | Habel et al., 2019           |

|    |           |       |         |                                                                                                                              |                                                                                           |                           |
|----|-----------|-------|---------|------------------------------------------------------------------------------------------------------------------------------|-------------------------------------------------------------------------------------------|---------------------------|
|    |           |       |         | Histological type (ductal/lobular/mixed) of breast cancer                                                                    | P=0.002                                                                                   | Habel et al., 2019        |
|    |           |       |         | breast cancer                                                                                                                | OR=0.39-0.49, p<0.0025 (haplotypes GCTT and GTTC rs243866- rs243865- rs243864- rs2285053) | Habel et al., 2019        |
|    |           |       |         | breast cancer                                                                                                                | p>0.05                                                                                    | Ou et al., 2020           |
|    |           |       |         | breast cancer                                                                                                                | p>0.05                                                                                    | Białkowska et al., 2020   |
| 20 | rs3918242 | MMP-9 | 139/194 | good prognosis (non-ductal type histology, positive ER status and the absence of TP53 mutation) among breast cancer patients | p < 0.05 (T)                                                                              | Grieu et al., 2004        |
|    |           |       |         | breast cancer metastasis                                                                                                     | p>0.05                                                                                    | Przybyłowska et al., 2006 |
|    |           |       |         | breast cancer malignance                                                                                                     | OR=2.61, p<0.05 (T)                                                                       | Przybyłowska et al., 2006 |
|    |           |       |         | breast cancer                                                                                                                | p>0.05                                                                                    | Roehe et al., 2007        |
|    |           |       |         | breast cancer                                                                                                                | p>0.05                                                                                    | Lei et al., 2007          |
|    |           |       |         | breast cancer progesterone receptor status                                                                                   | OR 2.34, p<0.05 (combination TT rs243865 and CC rs3918242)                                | Lei et al., 2007          |
|    |           |       |         | lymph node-positive breast cancer                                                                                            | OR=3.6, p<0.05 (TT) (mixed ethnicities)<br>OR=9.1, p<0.05 (TT) (caucasian)                | Hughes et al., 2007       |
|    |           |       |         | breast cancer                                                                                                                | OR=3.27, p=0.004 (T)                                                                      | Sadeghi et al., 2009      |

|    |           |           |       |                                           |                                                                  |                                             |
|----|-----------|-----------|-------|-------------------------------------------|------------------------------------------------------------------|---------------------------------------------|
|    |           |           |       | breast cancer                             | p>0.05                                                           | McColgan et al., 2009                       |
|    |           |           |       | breast cancer                             | p>0.05                                                           | Beeghly-Fadiel et al., 2011                 |
|    |           |           |       | breast cancer                             | p>0.05                                                           | Zhou et al., 2011                           |
|    |           |           |       | breast cancer<br>metastasis               | p>0.05                                                           | Liu et al., 2012                            |
|    |           |           |       | breast cancer                             | OR>1, p<0.001 (T)                                                | Chiranjeevi et al., 2014                    |
|    |           |           |       | breast cancer                             | OR=0.22, p=0.007 (TT)                                            | Shevchenko et al., 2014                     |
|    |           |           |       | breast cancer<br>lymph node<br>metastasis | OR=0.60, p=0.45 (CC)                                             | Shevchenko et al., 2014                     |
|    |           |           |       | breast cancer                             | OR=1.55, p=0.009<br>(TT vs. CT+CC)                               | Zhang et al., 2015                          |
|    |           |           |       | breast cancer                             | OR=1.87, p=0.035(T)                                              | Rahimi et al., 2015                         |
|    |           |           |       | breast cancer                             | OR=1.8, p<0.05 (T)                                               | AbdRaboh et al., 2016                       |
|    |           |           |       | breast cancer                             | p>0.05                                                           | Bargostavan et al., 2016                    |
|    |           |           |       | breast cancer                             | p>0.05                                                           | Toroghi et al., 2017                        |
|    |           |           |       | breast cancer                             | OR>1, p<0.05 (T)                                                 | Padala et al., 2017                         |
|    |           |           |       | breast cancer                             | OR=4.82, p<0.001 (T)                                             | Manshadi et al., 2018                       |
|    |           |           |       | breast cancer                             | p>0.05                                                           | Felizi et al., 2018                         |
|    |           |           |       | breast cancer                             | p>0.05                                                           | Abd Elmaogoud Ragab Ibrahim<br>et al., 2020 |
|    |           |           |       | breast cancer                             | OR=1.34, p=0.028 (T)                                             | Xu et al., 2020                             |
|    |           |           |       | breast cancer                             | OR=1.43, p=0.002 (T)                                             | Yan et al., 2022                            |
| 20 | rs3918249 | MMP-<br>9 | 16/25 | breast cancer                             | p>0.05                                                           | Beeghly-Fadiel et al., 2011                 |
|    |           |           |       | breast cancer                             | p>0.05                                                           | Slattery et al., 2013                       |
|    |           |           |       | ER-/PR- status of<br>breast cancer        | OR=1.18, p=0.048 and<br>OR=0.73, p=0.016 (haplotype<br>AT and GC | Slattery et al., 2013                       |

|    |           |       |        |                                       |                                                                                             |                             |
|----|-----------|-------|--------|---------------------------------------|---------------------------------------------------------------------------------------------|-----------------------------|
|    |           |       |        |                                       | rs3918261-rs3918249 respectively)                                                           |                             |
|    |           |       |        | ER+/PR- status of breast cancer       | OR=0.71, p=0.044 and OR=5.02, p=0.02 (haplotype GC and GT rs3918261-rs3918249 respectively) | Slattery et al., 2013       |
|    |           |       |        | breast cancer                         | p>0.05                                                                                      | Wang et al., 2018           |
|    |           |       |        | breast cancer                         | OR=1.37, p=0.019 (haplotype CCG rs3918249-rs3918254-rs3787268)                              | Wang et al., 2018           |
| 20 | rs17576   | MMP-9 | 94/127 | breast cancer                         | p>0.05                                                                                      | Beeghly-Fadiel et al., 2011 |
|    |           |       |        | breast cancer                         | OR=1.21, p=0.03 (Q279R)                                                                     | Resler et al., 2013         |
|    |           |       |        | breast cancer survival                | p>0.05                                                                                      | Fu et al., 2013             |
|    |           |       |        | breast cancer                         | OR=4.73, p=0.006 (GG)                                                                       | Chahil et al., 2015         |
|    |           |       |        | breast cancer                         | p>0.05                                                                                      | Zhang et al., 2015          |
|    |           |       |        | breast cancer                         | OR=13.13, p<0.003 (GG)                                                                      | Oliveira et al., 2020       |
|    |           |       |        | breast cancer in premenopausal women  | p>0.05                                                                                      | Oliveira et al., 2020       |
|    |           |       |        | breast cancer in postmenopausal women | OR>1, p<0.006 (GG)                                                                          | Oliveira et al., 2020       |
|    |           |       |        | breast cancer                         | p>0.05                                                                                      | Xu et al., 2020             |
|    |           |       |        | breast cancer                         | p>0.05                                                                                      | Yan et al., 2022            |
| 20 | rs3787268 |       | 20/33  | breast cancer                         | p>0.05                                                                                      | Beeghly-Fadiel et al., 2011 |

|    |           |       |       |                                                                       |                                                                |                             |
|----|-----------|-------|-------|-----------------------------------------------------------------------|----------------------------------------------------------------|-----------------------------|
|    |           | MMP-9 |       | poor disease-free survival of breast cancer patients                  | p=0.045 (AA+GA)                                                | Fu et al., 2013             |
|    |           |       |       | poor distance disease-free survival of breast cancer patients         | p=0.028 (AA+GA)                                                | Fu et al., 2013             |
|    |           |       |       | breast cancer                                                         | p>0.05                                                         | Slattery et al., 2013       |
|    |           |       |       | breast cancer (among women with the 71–100% Native American Ancestry) | OR=1.52, p=0.037 (AA+GA vs. GG)                                | Slattery et al., 2013       |
|    |           |       |       | breast cancer                                                         | p>0.05                                                         | Zhang et al., 2015          |
|    |           |       |       | breast cancer                                                         | OR=0.82, p=0.025 (A)                                           | Wang et al., 2018           |
|    |           |       |       | breast cancer                                                         | OR=1.37, p=0.019 (haplotype CCG rs3918249-rs3918254-rs3787268) | Wang et al., 2018           |
|    |           |       |       | breast cancer                                                         | p>0.05                                                         | Xu et al., 2020             |
|    |           |       |       | breast cancer                                                         | OR=0.82, p=0.007 (A)                                           | Yan et al., 2022            |
| 20 | rs2250889 | MMP-9 | 22/38 | breast cancer                                                         | p>0.05                                                         | Beeghly-Fadiel et al., 2011 |
|    |           |       |       | breast cancer survival                                                | p>0.05                                                         | Fu et al., 2013             |
|    |           |       |       | breast cancer                                                         | OR=10.84, p=0.007 (GG)                                         | Chahil et al., 2015         |
|    |           |       |       | breast cancer                                                         | p>0.05                                                         | Zhang et al., 2015          |
|    |           |       |       | breast cancer                                                         | p>0.05                                                         | Al-Eitan et al., 2017       |
|    |           |       |       | breast cancer                                                         | OR=2.53, p=0.012 (GG+GC vs. CC)                                | Xu et al., 2020             |
|    |           |       |       | breast cancer                                                         | p>0.05                                                         | Yan et al., 2022            |

|    |         |       |       |                                                                                                                              |                                                              |                 |
|----|---------|-------|-------|------------------------------------------------------------------------------------------------------------------------------|--------------------------------------------------------------|-----------------|
| 20 | rs17577 | MMP-9 | 28/30 | poor disease-free survival among estrogen receptor (ER)+/epidermal growth receptor 2 (HER-2)-breast cancer patients          | HR=2.59, p<0.05 (combination AA+GA rs3787268 and GG rs17577) | Fu et al., 2013 |
|    |         |       |       | poor distance disease-free survival among estrogen receptor (ER)+/epidermal growth receptor 2 (HER-2)-breast cancer patients | HR=3.25, p<0.05 (combination AA+GA rs3787268 and GG rs17577) | Fu et al., 2013 |

### References

1. Abd Elmaogoud Ragab Ibrahim F, Essam Elfeky S, Haroun M, et al. Association of matrix metalloproteinases 3 and 9 single nucleotide polymorphisms with breast cancer risk: A case-control study. *Mol Clin Oncol.* 2020;13(1):54-62. doi:10.3892/mco.2020.2041
2. AbdRaboh, N.R., Bayoumi, F.A., 2016. Gene polymorphism of matrix metalloproteinases 3 and 9 in breast cancer. *Gene Reports* 5, 151–156.
3. Al-Eitan LN, Jamous RI, Khasawneh RH. Candidate Gene Analysis of Breast Cancer in the Jordanian Population of Arab Descent: A Case-Control Study. *Cancer Invest.* 2017;35(4):256-270. doi:10.1080/07357907.2017.1289217
4. Balkhi S, Mashayekhi F, Salehzadeh A, Saedi HS. Matrix metalloproteinase (MMP)-1 and MMP-3 gene variations affect MMP-1 and -3 serum concentration and associates with breast cancer. *Mol Biol Rep.* 2020 Dec;47(12):9637-9644. doi: 10.1007/s11033-020-05962-x.
5. Bargostavan, M.H., Eslami, G., Esfandiari, N., Shams, S.A., 2016. MMP9 Promoter Polymorphism (-1562 C/T) Does not Affect the Serum Levels of Soluble MICB and MICA in Breast Cancer. *Iran. J. Immunol.* 13 (1), 45–53.
6. Beeghly-Fadiel A, Cai Q, Lu W, Long J, Gao YT, Shu XO, et al. No association between matrix metalloproteinase-1 or matrix metalloproteinase-3 polymorphisms and breast cancer susceptibility: a report from the Shanghai Breast Cancer Study. *Cancer Epidemiol Biomarkers Prev.* 2009a;18:1324–1327.



7. Beeghly-Fadiel A, Lu W, Long JR, Shu XO, Zheng Y, et al. (2009b) Matrix metalloproteinase-2 polymorphisms and breast cancer susceptibility. *Cancer epidemiology, biomarkers & prevention: a publication of the American Association for Cancer Research, cosponsored by the American Society of Preventive Oncology* 18: 1770–1776.
8. Beeghly-Fadiel A, Lu W, Shu XO, Long J, Cai Q, Xiang Y, Gao YT, Zheng W. MMP9 polymorphisms and breast cancer risk: a report from the Shanghai Breast Cancer Genetics Study. *Breast Cancer Res Treat.* 2011 Apr;126(2):507-13. doi: 10.1007/s10549-010-1119-1.
9. Białkowska K, Marciniak W, Muszyńska M, Baszuk P, Gupta S, Jaworska-Bieniek K, Sukiennicki G, Durda K, Gromowski T, Lener M, Prajzendanc K, Łukomska A, Cybulski C, Huzarski T, Gronwald J, Dębniak T, Lubiński J, Jakubowska A. Polymorphisms in *MMP-1*, *MMP-2*, *MMP-7*, *MMP-13* and *MT2A* do not contribute to breast, lung and colon cancer risk in polish population. *Hered Cancer Clin Pract.* 2020;18:16. doi: 10.1186/s13053-020-00147-w.
10. Biondi ML, Turri O, Leviti S, Seminati R, Cecchini F, Bernini M, Ghilardi G, Guagnellini E. MMP1 and MMP3 polymorphisms in promoter regions and cancer. *Clin Chem.* 2000;46(12):2023-4.
11. Chahil JK, Munretnam K, Samsudin N, Lye SH, Hashim NA, Ramzi NH, Velapasamy S, Wee LL, Alex L. Genetic polymorphisms associated with breast cancer in malaysian cohort. *Indian J Clin Biochem.* 2015 Apr;30(2):134-9. doi: 10.1007/s12291-013-0414-0.
12. Chan SC. Identification and analysis of single nucleotide polymorphisms in matrix metalloproteinase 2 and 3 genes in Malaysian breast cancer patients [doctor's thesis] Serdang: Universiti Putra Malaysia; 2013.
13. Chiranjeevi P, Spurthi KM, Rani NS, Kumar GR, Aiyengar TM, Saraswati M, Srilatha G, Kumar GK, Sinha S, Kumari CS, Reddy BN, Vishnupriya S, Rani HS. Gelatinase B (-1562C/T) polymorphism in tumor progression and invasion of breast cancer. *Tumour Biol.* 2014 Feb;35(2):1351-6. doi: 10.1007/s13277-013-1181-5.
14. Decock J., Long J.R., Laxton R.C., Shu X.O., Hodgkinson C., Hendrickx W., Pearce E.G., Gao Y.T., Pereira A.C., Paridaens R., et al. Association of matrix metalloproteinase-8 gene variation with breast cancer prognosis. *Cancer Res.* 2007;67:10214–10221. doi: 10.1158/0008-5472.CAN-07-1683.
15. Delgado-Enciso I, Cepeda-Lopez FR, Monrroy-Guizar EA, Bautista-Lam JR, Andrade-Soto M, et al. (2008) Matrix metalloproteinase-2 promoter polymorphism is associated with breast cancer in a Mexican population. *Gynecologic and obstetric investigation* 65: 68–72.
16. Felizi RT, Veiga MG, Carelli Filho I, Souto RPD, Fernandes CE, Oliveira E. Association between Matrix Metalloproteinase 9 Polymorphism and Breast Cancer Risk. *Rev Bras Ginecol Obstet.* 2018 Oct;40(10):620-624. English. doi: 10.1055/s-0038-1673366.
17. Fu F, Wang C, Chen LM, Huang M, Huang HG. The influence of functional polymorphisms in matrix metalloproteinase 9 on survival of breast cancer patients in a Chinese population. *DNA Cell Biol.* 2013 May;32(5):274-82. doi: 10.1089/dna.2012.1928.
18. Ghilardi G, Biondi ML, Caputo M, Leviti S, DeMonti M, Guagnellini E, Scorza R. A single nucleotide polymorphism in the matrix metalloproteinase-3 promoter enhances breast cancer susceptibility. *Clin Cancer Res.* 2002;8(12):3820-3.

19. Grieu F, Li WQ, Iacopetta B (2004) Genetic polymorphisms in the MMP-2 and MMP-9 genes and breast cancer phenotype. *Breast Cancer Research and Treatment* 88: 197–204.
20. Habel AF, Ghali RM, Bouaziz H, Daldoul A, Hadj-Ahmed M, Mokrani A, Zaied S, Hechiche M, Rahal K, Yacoubi-Loueslati B, Almawi WY. Common matrix metalloproteinase-2 gene variants and altered susceptibility to breast cancer and associated features in Tunisian women. *Tumour Biol.* 2019 Apr;41(4):1010428319845749. doi: 10.1177/1010428319845749.
21. Hsiao CL, Liu LC, Shih TC, Lai YL, Hsu SW, Wang HC, Pan SY, Shen TC, Tsai CW, Chang WS, Su CH, Way TD, Chung JG, Bau DT. The Association of *Matrix Metalloproteinase-1* Promoter Polymorphisms with Breast Cancer. *In Vivo.* 2018;32(3):487-491. doi: 10.21873/invivo.11265.
22. Hughes S, Agbaje O, Bowen RL, Holliday DL, Shaw JA, Duffy S, Jones JL. Matrix metalloproteinase single-nucleotide polymorphisms and haplotypes predict breast cancer progression. *Clin Cancer Res.* 2007;13(22 Pt 1):6673-80. doi: 10.1158/1078-0432.CCR-07-0884.
23. Ledwoń JK, Hennig EE, Maryan N, Goryca K, Nowakowska D, Niwińska A, Ostrowski J. Common low-penetrance risk variants associated with breast cancer in Polish women. *BMC Cancer.* 2013 Oct 30;13:510. doi: 10.1186/1471-2407-13-510.
24. Lei H, Hemminki K, Altieri A, Johansson R, Enquist K, Hallmans G, Lenner P, Försti A. Promoter polymorphisms in matrix metalloproteinases and their inhibitors: few associations with breast cancer susceptibility and progression. *Breast Cancer Res Treat.* 2007;103(1):61-9. doi: 10.1007/s10549-006-9345-2.
25. Liu D, Guo H, Li Y, Xu X, Yang K, et al. (2012) Association between polymorphisms in the promoter regions of matrix metalloproteinases (MMPs) and risk of cancer metastasis: a meta-analysis. *PLoS One* 7: e31251.
26. Manshadi, Z.D., Hamid, M., Kosari, F., Tayebinia, H., Khodadadi, I., 2018. The relationship between matrix metalloproteinase gene polymorphisms and tumor type, tumor size, and metastasis in women with breast cancer in Central Iran. *Middle East J. Cancer* 9 (2), 123–131.
27. Mavaddat N, Dunning AM, Ponder BA, Easton DF, Pharoah PD. Common genetic variation in candidate genes and susceptibility to subtypes of breast cancer. *Cancer Epidemiol Biomarkers Prev.* 2009;18(1):255-259. doi:10.1158/1055-9965.EPI-08-0704
28. McColgan P, Sharma P. Polymorphisms of matrix metalloproteinases 1, 2, 3 and 9 and susceptibility to lung, breast and colorectal cancer in over 30,000 subjects. *Int J Cancer.* 2009 Sep 15;125(6):1473-8. doi: 10.1002/ijc.24441.
29. Néjima DB, Zarkouna YB, Gammoudi A, Manai M, Boussen H. Prognostic impact of polymorphism of matrix metalloproteinase-2 and metalloproteinase tissue inhibitor-2 promoters in breast cancer in tunisia: Case-control study. *Tumour Biol* 36(5): 3815-3822, 2015. DOI: 10.1007/s13277-014-3023-5
30. Oliveira VA, Chagas DC, Amorim JR, Pereira RO, Nogueira TA, Borges VML, Campos-Verde LM, Martins LM, Rodrigues GP, Nery Júnior EJ, Sampaio FA, Lopes-Costa PV, Sousa JMCE, Silva VC, Silva FCCD, Silva BBD. Association between matrix

metalloproteinase-9 gene polymorphism and breast cancer in Brazilian women. *Clinics (Sao Paulo)*. 2020 Oct 26;75:e1762. doi: 10.6061/clinics/2020/e1762.

31. Ou YX, Bi R. Meta-analysis on the relationship between the SNP of MMP-2-1306 C>T and susceptibility to breast cancer. *Eur Rev Med Pharmacol Sci*. 2020 Feb;24(3):1264-1270. doi: 10.26355/eurrev\_202002\_20181.

32. Padala C, Tupurani MA, Puranam K, et al. Synergistic effect of collagenase-1 (MMP1), stromelysin-1 (MMP3) and gelatinase-B (MMP9) gene polymorphisms in breast cancer. *PLoS One*. 2017;12(9):e0184448. doi:10.1371/journal.pone.0184448

33. Pharoah PD, Tyrer J, Dunning AM, Easton DF, Ponder BA; SEARCH Investigators. Association between common variation in 120 candidate genes and breast cancer risk. *PLoS Genet*. 2007;3(3):e42. doi:10.1371/journal.pgen.0030042

34. Przybylowska K, Kluczna A, Zadrozny M, Krawczyk T, Kulig A, Rykala J, Kolacinska A, Morawiec Z, Drzewoski J, Blasiak J. Polymorphisms of the promoter regions of matrix metalloproteinases genes MMP-1 and MMP-9 in breast cancer. *Breast Cancer Res Treat*. 2006;95(1):65-72. doi: 10.1007/s10549-005-9042-6.

35. Przybylowska K, Zielinska J, Zadrozny M, Krawczyk T, Kulig A, Wozniak P, Rykala J, Kolacinska A, Morawiec Z, Drzewoski J, Blasiak J. An association between the matrix metalloproteinase 1 promoter gene polymorphism and lymphnode metastasis in breast cancer. *J Exp Clin Cancer Res*. 2004;23(1):121-5.

36. Rahimi Z, Yari K, Rahimi Z. Matrix metalloproteinase-9 -1562T allele and its combination with MMP-2 -735 C allele are risk factors for breast cancer. *Asian Pac J Cancer Prev*. 2015;16(3):1175-9. doi: 10.7314/apjcp.2015.16.3.1175.

37. Resler AJ, Malone KE, Johnson LG, Malkki M, Petersdorf EW, McKnight B, Madeleine MM. Genetic variation in TLR or NFkappaB pathways and the risk of breast cancer: a case-control study. *BMC Cancer*. 2013 May 1;13:219. doi: 10.1186/1471-2407-13-219.

38. Roehe AV, Frazzon AP, Agnes G, Damin AP, Hartman AA, et al. (2007) Detection of polymorphisms in the promoters of matrix metalloproteinases 2 and 9 genes in breast cancer in South Brazil: preliminary results. *Breast Cancer Research and Treatment* 102: 123–124.

39. Sadeghi M, Motovali Bashi M, Hojati Z. MMP-9 promoter polymorphism associated with tumor progression of breast cancer in Iranian population. *International Journal of Integrative Biology*. 2009;6(1):33–37.

40. Saeed HM, Alanazi MS, Alshahrani O, et al. Matrix metalloproteinase-2 C(–1306) T promoter polymorphism and breast cancer risk in the Saudi population. *Acta Biochim Pol*. 2013;60(3):405–409.

41. Shevchenko AV, Konenkov VI, Garbukov Elu, Stakheeva MN. Associating of polymorphism in the promoter regions of genes of metalloproteinase (MMP2, MMP3, MMP9) with options of the clinical course of breast cancer in Russian women. *Vopr Onkol*. 2014;60(5):630-635.

42. Slaterry M.L., John E., Torres-Mejia G., Stern M., Lundgreen A., Hines L., Giuliano A., Baumgartner K., Herrick J., Wolff R.K. Matrix metalloproteinase genes are associated with breast cancer risk and survival: The Breast Cancer Health Disparities Study. *PLoS ONE*. 2013;8:e63165. doi: 10.1371/journal.pone.0063165.

43. Su CH, Lane HY, Hsiao CL, Liu LC, Ji HX, Li HT, Yen ST, Su CH, Hsia TC, Chang WS, Tsai CW, Bau DT. Matrix Metalloproteinase-1 Genetic Polymorphism in Breast Cancer in Taiwanese. *Anticancer Res.* 2016 Jul;36(7):3341-5.
44. Sui J, Huang J, Zhang Y. The *MMP-1* Gene rs1799750 Polymorphism Is Associated with Breast Cancer Risk. *Genet Test Mol Biomarkers.* 2021 Jul;25(7):496-503. doi: 10.1089/gtmb.2021.0016.
45. Toroghi, F., Mashayekhi, F., Montazeri, V., Saedi, H.S., Salehi, Z., 2017. Association of MMP-9 promoter polymorphism and breast cancer among Iranian patients. *Eur. J. Oncol.* 1 (22), 38–42.
46. Wang K, Zhou Y, Li G, Wen X, Kou Y, Yu J, He H, Zhao Q, Xue F, Wang J, Zhao X. MMP8 and MMP9 gene polymorphisms were associated with breast cancer risk in a Chinese Han population. *Sci Rep.* 2018 Sep 7;8(1):13422. doi: 10.1038/s41598-018-31664-3.
47. Xu T, Zhang S, Qiu D, Li X, Fan Y. Association between matrix metalloproteinase 9 polymorphisms and breast cancer risk: An updated meta-analysis and trial sequential analysis. *Gene.* 2020 Oct 30;759:144972. doi: 10.1016/j.gene.2020.144972.
48. Yan C, Sun C, Lu D, Zhao T, Ding X, Zamir I, Tang M, Shao C, Zhang F. Estimation of associations between MMP9 gene polymorphisms and breast cancer: Evidence from a meta-analysis. *Int J Biol Markers.* 2022 Feb 14:17246008221076145. doi: 10.1177/17246008221076145.
49. Yang L, Li N, Wang S, Kong Y, Tang H, Xie X, Xie X. Lack of association between the matrix metalloproteinase-2 -1306C>T polymorphism and breast cancer susceptibility: a meta-analysis. *Asian Pac J Cancer Prev.* 2014;15(12):4823-7. doi: 10.7314/apjcp.2014.15.12.4823.
50. Zagouri F, Sergentanis TN, Gazouli M, et al. MMP-2 -1306C>T polymorphism in breast cancer: a case-control study in a south European population. *Mol Biol Rep.* 2013;40(8):5035–5040.
51. Zhang X, Jin G, Li J, Zhang L. Association between four MMP-9 polymorphisms and breast cancer risk: a meta-analysis. *Med Sci Monit.* 2015;21:1115-1123. doi:10.12659/MSM.893890
52. Zhou P, Du LF, Lv GQ, Yu XM, Gu YL, Li JP, Zhang C. Current evidence on the relationship between four polymorphisms in the matrix metalloproteinases (MMP) gene and breast cancer risk: a meta-analysis. *Breast Cancer Res Treat.* 2011 Jun;127(3):813-8. doi: 10.1007/s10549-010-1294-0.
53. Zhou Y, Yu C, Miao X, Tan W, Liang G, Xiong P, Sun T, Lin D. Substantial reduction in risk of breast cancer associated with genetic polymorphisms in the promoters of the matrix metalloproteinase-2 and tissue inhibitor of metalloproteinase-2 genes. *Carcinogenesis.* 2004;25(3):399-404. doi: 10.1093/carcin/bgh020.
54. Zhou Z, Ma X, Wang F, Sun L, Zhang G. A Matrix Metalloproteinase-1 Polymorphism, *MMP1-1607* (1G>2G), Is Associated with Increased Cancer Risk: A Meta-Analysis Including 21,327 Patients. *Dis Markers.* 2018;2018:7565834. doi: 10.1155/2018/7565834.
