# Supplementary material for: The Modifying Effect of Obesity on the Association of Matrix Metalloproteinase Gene Polymorphisms with Breast Cancer Risk
Source: MDPI journal article supplement (doi:10.3390/biomedicines10102617), 2022-10-18
Supplement: s1 [file s1]

## Supplementary Table S4

The allele and genotype frequencies of the studied SNPs in the breast cancer and control groups with BMI $\geq$ 30.

| Chr                            | SNP       | Gene         | Minor allele | Major allele | Minor allele frequency | Number of the studied chromosomes | Genotype distribution * | H <sub>o</sub> | H <sub>e</sub> | P <sub>HWE</sub> |
|--------------------------------|-----------|--------------|--------------|--------------|------------------------|-----------------------------------|-------------------------|----------------|----------------|------------------|
| Breast cancer patients (n=119) |           |              |              |              |                        |                                   |                         |                |                |                  |
| 11                             | rs1940475 | <i>MMP-8</i> | T            | C            | 0.487                  | 236                               | 30/55/33                | 0.47           | 0.50           | 0.465            |
| 11                             | rs1799750 | <i>MMP-1</i> | 2G           | 1G           | 0.487                  | 234                               | 28/58/31                | 0.50           | 0.50           | 1.000            |
| 11                             | rs679620  | <i>MMP-3</i> | T            | C            | 0.500                  | 236                               | 29/60/29                | 0.51           | 0.50           | 1.000            |
| 16                             | rs243865  | <i>MMP-2</i> | T            | C            | 0.214                  | 234                               | 5/40/72                 | 0.34           | 0.34           | 1.000            |
| 20                             | rs3918242 | <i>MMP-9</i> | T            | C            | 0.209                  | 234                               | 6/37/74                 | 0.32           | 0.33           | 0.583            |
| 20                             | rs3918249 | <i>MMP-9</i> | C            | T            | 0.361                  | 230                               | 17/49/49                | 0.43           | 0.46           | 0.422            |
| 20                             | rs17576   | <i>MMP-9</i> | G            | A            | 0.325                  | 234                               | 14/48/55                | 0.41           | 0.44           | 0.527            |
| 20                             | rs3787268 | <i>MMP-9</i> | A            | G            | 0.186                  | 236                               | 4/36/78                 | 0.31           | 0.30           | 1.000            |
| 20                             | rs2250889 | <i>MMP-9</i> | G            | C            | 0.067                  | 238                               | 1/14/104                | 0.12           | 0.13           | 0.417            |
| 20                             | rs17577   | <i>MMP-9</i> | A            | G            | 0.185                  | 232                               | 5/33/78                 | 0.28           | 0.30           | 0.539            |
| Control group (n=190)          |           |              |              |              |                        |                                   |                         |                |                |                  |
| 11                             | rs1940475 | <i>MMP-8</i> | T            | C            | 0.471                  | 378                               | 45/88/56                | 0.47           | 0.50           | 0.382            |
| 11                             | rs1799750 | <i>MMP-1</i> | 2G           | 1G           | 0.476                  | 372                               | 49/79/58                | 0.42           | 0.50           | 0.041            |
| 11                             | rs679620  | <i>MMP-3</i> | T            | C            | 0.500                  | 376                               | 47/94/47                | 0.50           | 0.50           | 1.000            |
| 16                             | rs243865  | <i>MMP-2</i> | T            | C            | 0.227                  | 374                               | 12/61/114               | 0.33           | 0.35           | 0.305            |
| 20                             | rs3918242 | <i>MMP-9</i> | T            | C            | 0.196                  | 372                               | 6/61/119                | 0.33           | 0.32           | 0.816            |
| 20                             | rs3918249 | <i>MMP-9</i> | C            | T            | 0.406                  | 372                               | 33/85/68                | 0.46           | 0.48           | 0.543            |
| 20                             | rs17576   | <i>MMP-9</i> | G            | A            | 0.405                  | 378                               | 35/83/71                | 0.44           | 0.48           | 0.229            |
| 20                             | rs3787268 | <i>MMP-9</i> | A            | G            | 0.211                  | 380                               | 5/70/115                | 0.37           | 0.33           | 0.189            |
| 20                             | rs2250889 | <i>MMP-9</i> | G            | C            | 0.114                  | 376                               | 5/33/150                | 0.18           | 0.20           | 0.072            |
| 20                             | rs17577   | <i>MMP-9</i> | A            | G            | 0.204                  | 372                               | 9/58/119                | 0.31           | 0.33           | 0.651            |

Note: \* minor allele homozygotes / heterozygotes / major allele homozygotes.
